# Supplementary material for: An injectable miRNA-activated matrix for effective bone regeneration in vivo
Source: Royal Society of Chemistry journal article supplement (doi:10.1039/c6tb01790h), 2016-01-01
Supplement: c6tb01790h1.pdf [file c6tb01790h1.pdf]

## Supporting Information

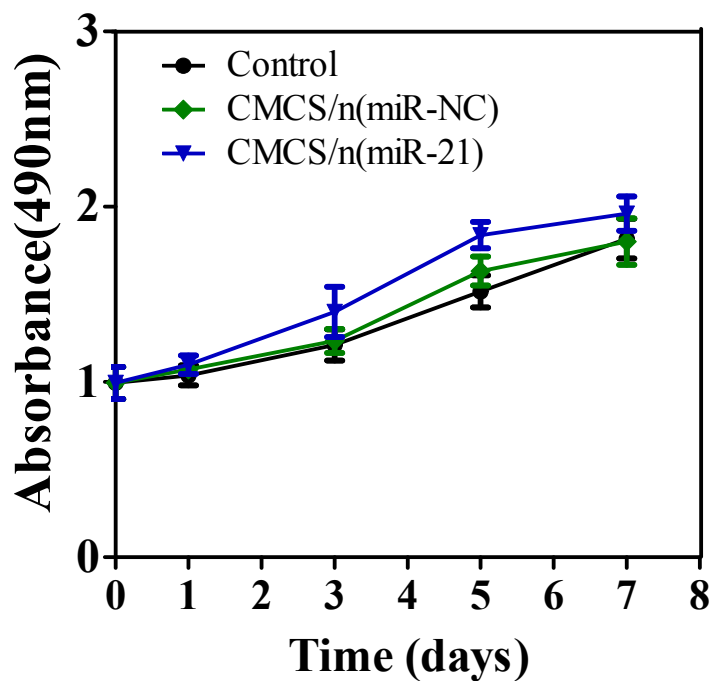

Figure S1. MTT analysis of cell proliferation at 0, 1, 3, 5 and 7 days.

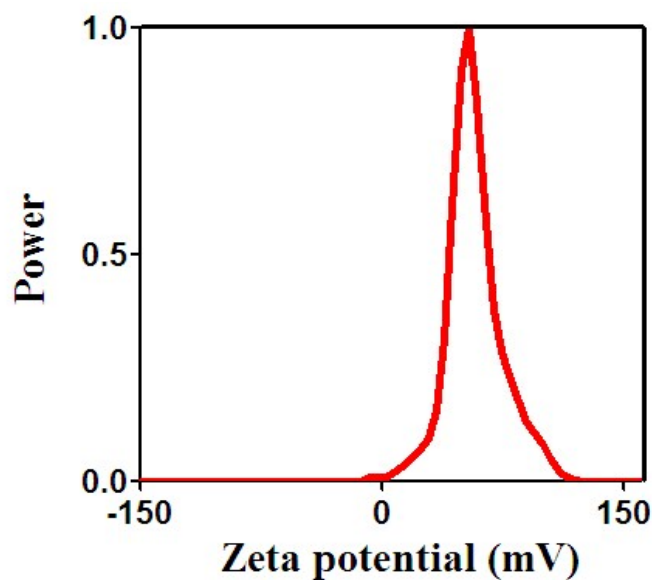

Figure S2. Zeta potential (mV) of lipo/miR-21 by DLS in phosphate buffer (pH=7.4).

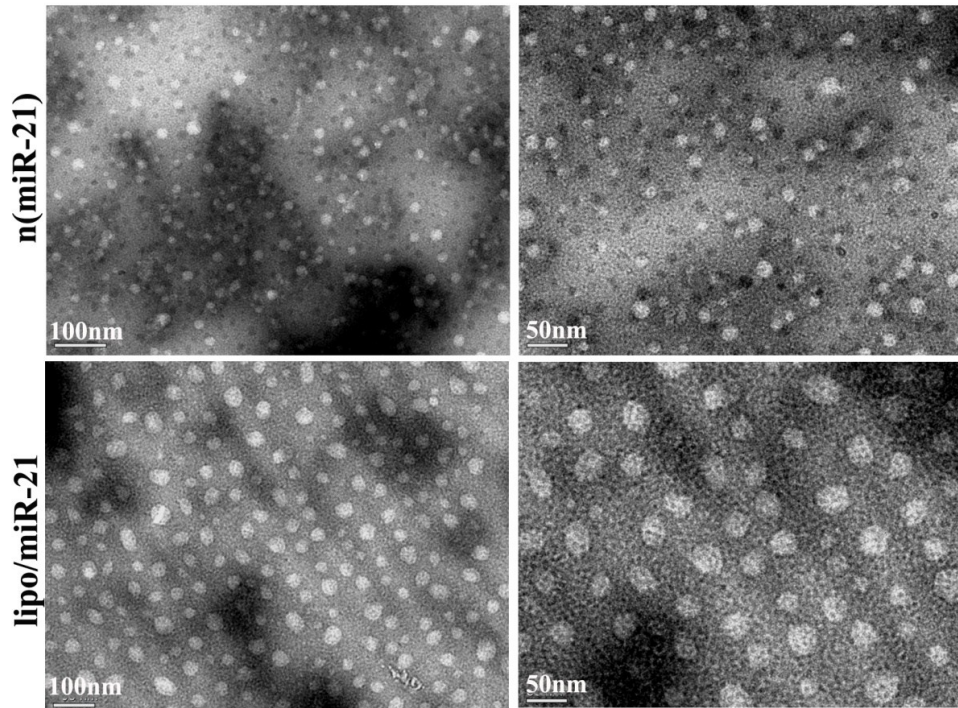

**Figure S3.** The TEM images of the n (miR-21) and lipo/miR-21.

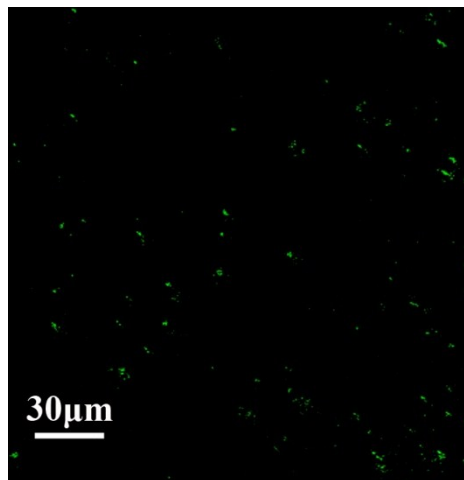

**Figure S4.** Confocal image of the miR-21 nanocapsules dispersed in the CMCS matrix. The miR-21 was labeled with FAM in advance. Scale bar indicates 30 µm.

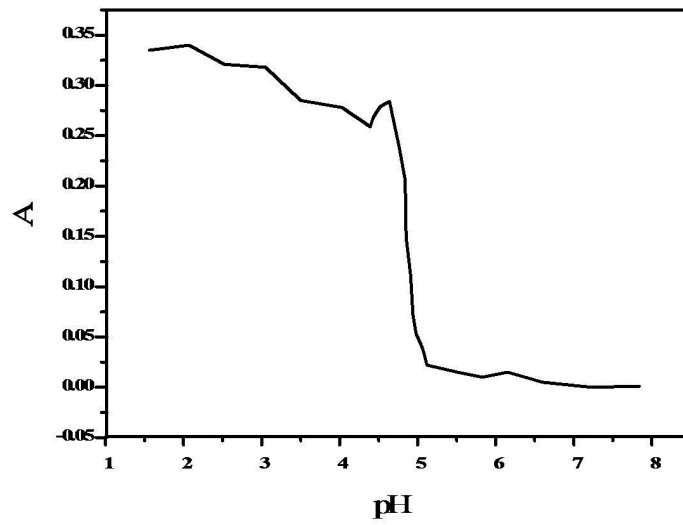

**Figure S5.** Analysis of isoelectric point of the CMCS with the change of pH (A is representative of absorbance under visible light).

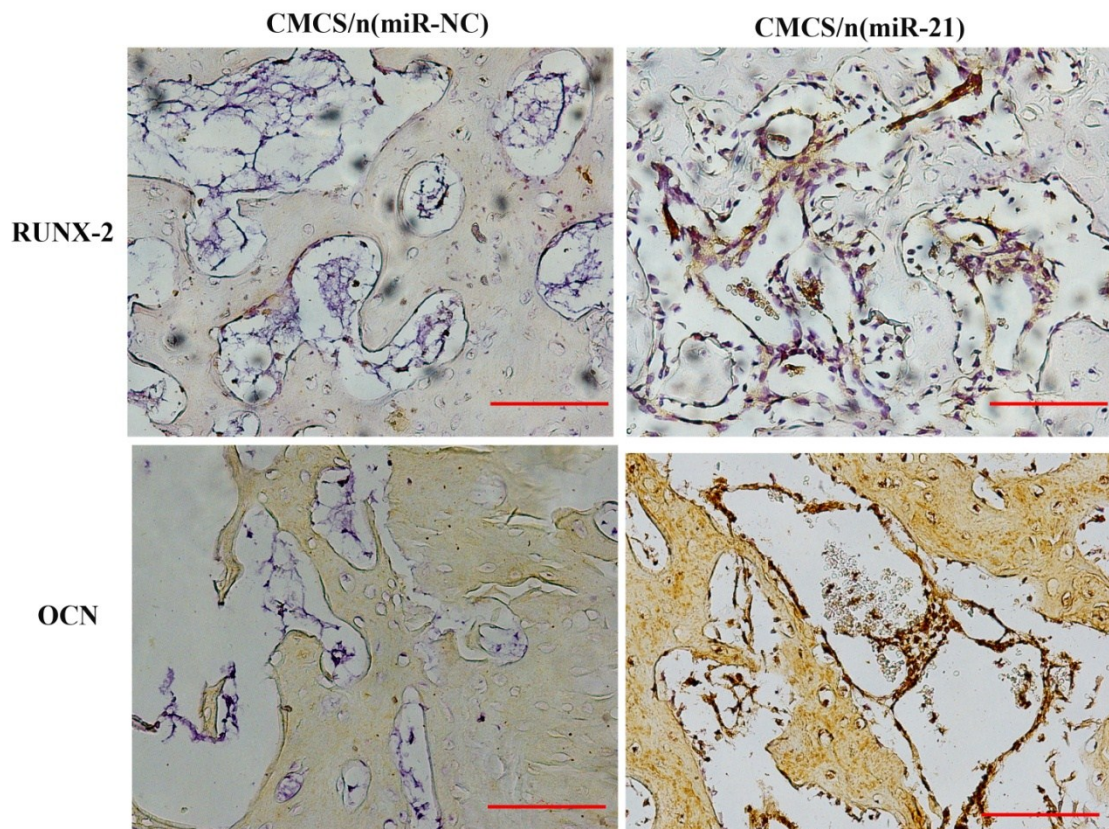

**Figure S6.** Immunohistochemical staining to show the expression levels of osteogenic makers (RUNX-2 and OCN) *in vivo* after two weeks implantation.

**Table S1.** The micro-CT data

|                    | BV/TV (%) |      |      |      |      | Mean (%) | SD (%) |
|--------------------|-----------|------|------|------|------|----------|--------|
| CMCS/n(miR-NC)- 2W | 17.8      | 18.6 | 17.2 | 16.8 | 20.1 | 18.1     | 1.31   |
| CMCS/n(miR-21)-2W  | 30.2      | 29.9 | 28.3 | 29.4 | 28.7 | 29.3     | 0.80   |
| CMCS/n(miR-NC)-4W  | 32.9      | 30.8 | 33.4 | 31.5 | 32.2 | 32.2     | 1.05   |
| CMCS/n(miR-21)-4W  | 42.4      | 49.9 | 45.4 | 39.5 | 48.2 | 45.1     | 4.22   |
